# Supplementary material for: Adult Plant Development in Triticale (× Triticosecale Wittmack) Is Controlled by Dynamic Genetic Patterns of Regulation
Source: PubMed Central journal article supplement (PMC4169150; doi:10.1534/g3.114.012989), 2014-09-01
Supplement: supp_4.9.1585_012989SI.pdf [file supp_4.9.1585_012989SI.pdf]

## Adult plant development in triticale ( $\times$ *Triticosecale* Wittmack) is controlled by dynamic genetic patterns of regulation

Tobias Würschum<sup>\*1</sup>, Wenxin Liu<sup>§</sup>, Katharina V. Alheit<sup>\*</sup>, Matthew R. Tucker<sup>†</sup>, Manje Gowda<sup>\*</sup>, Elmar A. Weissmann<sup>‡</sup>, Volker Hahn<sup>\*</sup>, Hans Peter Maurer<sup>\*</sup>

<sup>\*</sup> State Plant Breeding Institute, University of Hohenheim, 70599 Stuttgart, Germany

<sup>§</sup> Crop Genetics and Breeding Department, China Agricultural University, 100193 Beijing, China

<sup>†</sup> ARC Centre of Excellence for Plant Cell Walls, University of Adelaide, Waite Campus, Urrbrae SA 5064, Australia

<sup>‡</sup> Saatzucht Dr. Hege GbR Domäne Hohebuch, 74638 Waldenburg, Germany

<sup>1</sup> Corresponding author: State Plant Breeding Institute, University of Hohenheim, 70599 Stuttgart, Germany. Email: [tobias.wuerschum@uni-hohenheim.de](mailto:tobias.wuerschum@uni-hohenheim.de)

Corresponding author:

Tobias Würschum

Address: State Plant Breeding Institute, University of Hohenheim, 70599 Stuttgart, Germany.

Phone: +49-711-45922687

E-mail: [tobias.wuerschum@uni-hohenheim.de](mailto:tobias.wuerschum@uni-hohenheim.de)

DOI: 10.1534/g3.114.012989

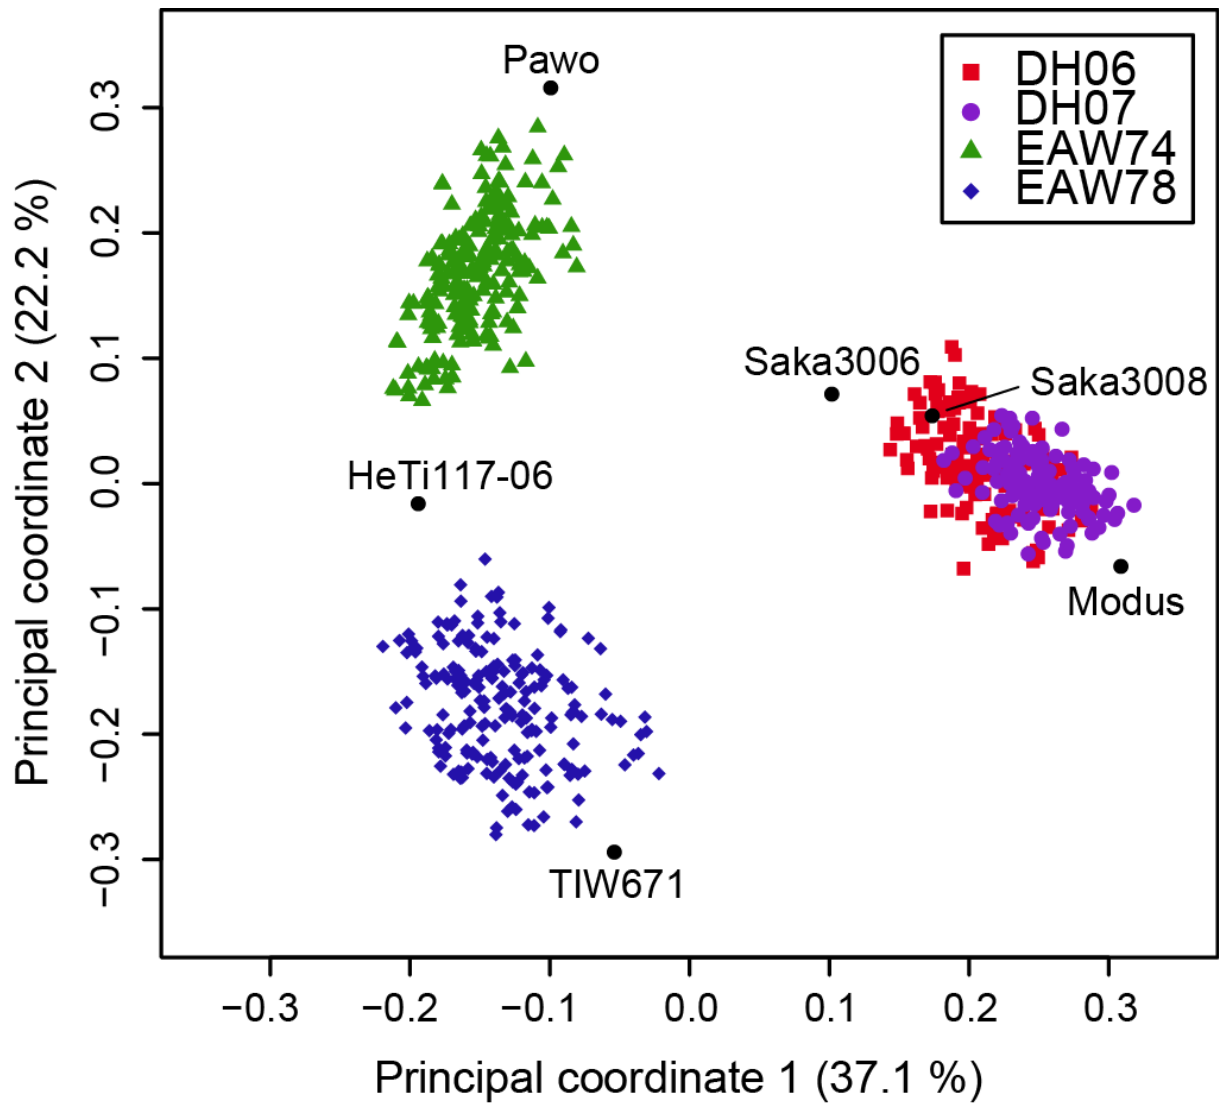

**Figure S1** Principal coordinate analysis of the four families and the six parents based on modified Rogers' distance estimates. Percentages in parentheses refer to the proportion of variance explained by the principal coordinate.

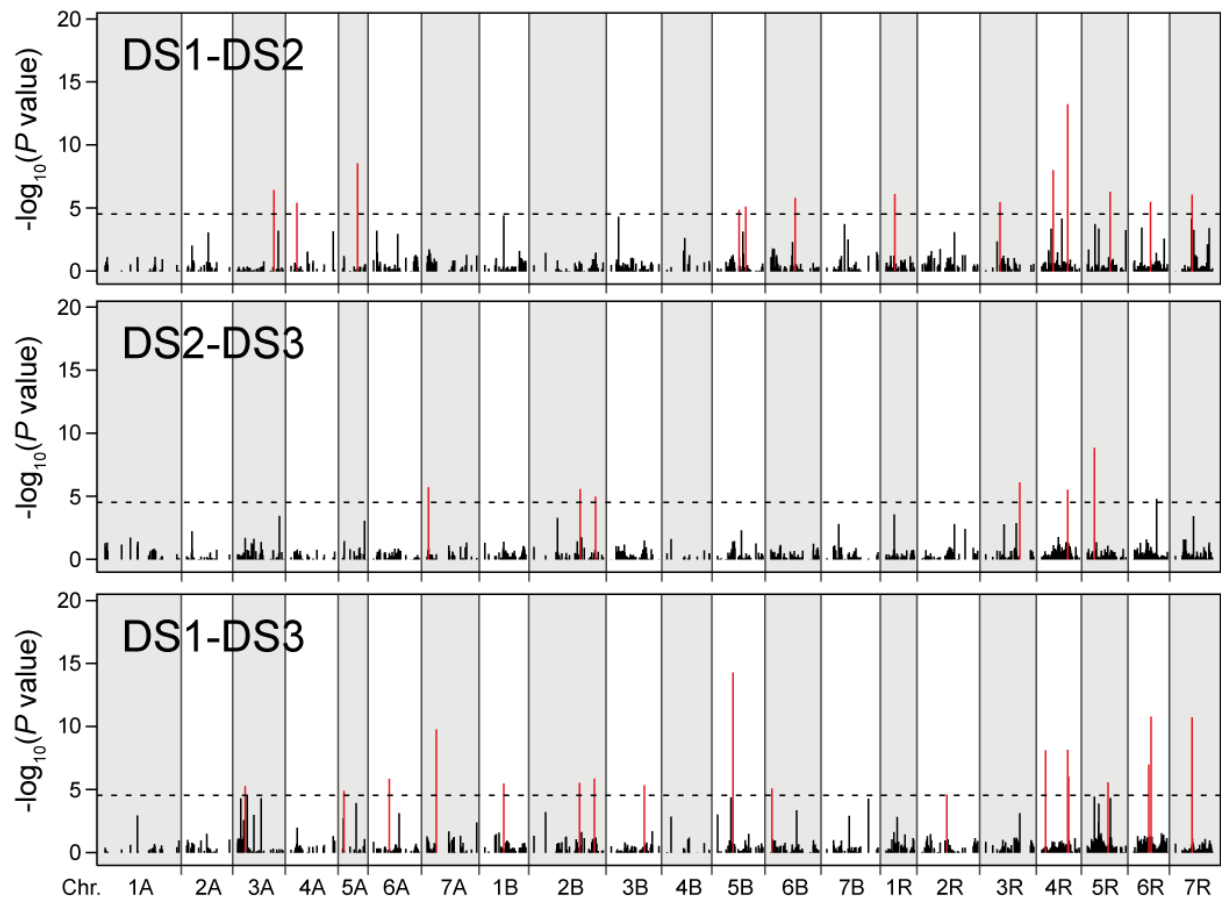

**Figure S2** QTL detected for the progression in developmental stage between the three time points (DS1, DS2, DS3).

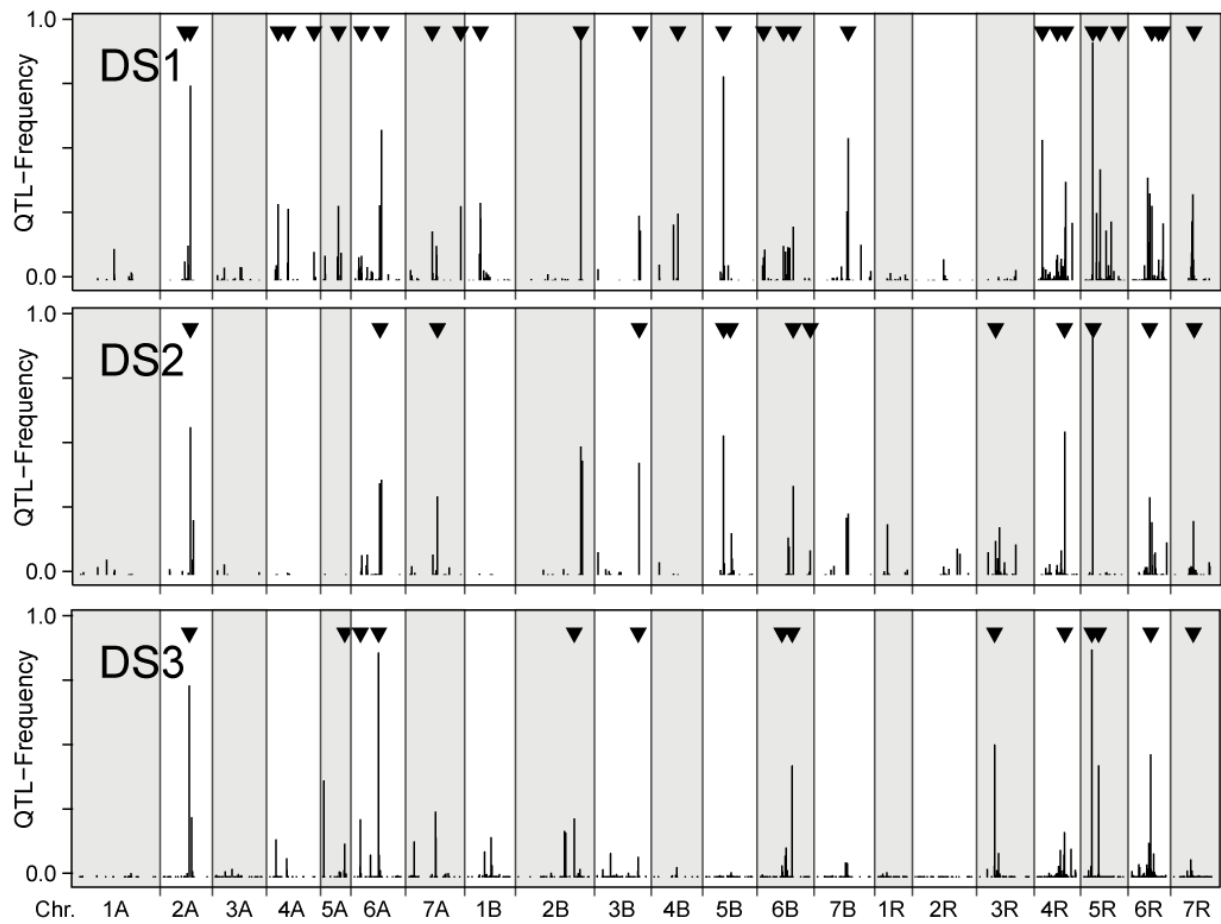

**Figure S3** Frequency distributions from the fivefold cross-validation for the QTL detected for developmental stage at three time points (DS1-DS3). The arrowheads indicate the positions of QTL detected with the full data set.

**File S1**

**Phenotypic and genotypic data underlying the study and P values from the genome scans.**

Available for download as an Excel file at <http://www.g3journal.org/lookup/suppl/doi:10.1534/g3.114.012989/-/DC1>

**Table S1 Summary statistics for developmental stage at three time points (DS1-DS3).**

|                         | DS1    | DS2    | DS3    |
|-------------------------|--------|--------|--------|
| Min                     | 38.0   | 58.6   | 74.6   |
| Mean                    | 44.0   | 67.0   | 80.9   |
| Max                     | 49.6   | 69.4   | 84.3   |
| $\sigma_G^2$            | 4.48** | 3.25** | 1.96** |
| $\sigma_{G \times E}^2$ | 1.01** | 1.45** | 0.62** |
| $\sigma_e^2$            | 1.53   | 1.28   | 3.56   |
| $h^2$                   | 0.90   | 0.85   | 0.72   |

Genotypic variance ( $\sigma_G^2$ ), genotype-by-environment interaction variance ( $\sigma_{G \times E}^2$ ), error variance ( $\sigma_e^2$ ) and heritability ( $h^2$ ). \*\*significant at  $P < 0.01$

**Table S2 QTL detected for developmental stage at three time points (DS1-DS3).** Chromosome, position (in cM), QTL-effect and proportion of genotypic variance explained by the QTL (in percent). Markers within an arbitrarily defined 10 cM interval were considered as identical QTL. The allele status of the six parents at these markers is also provided.

| Marker     | Ch r. | Pos.  | DS1        |       | DS2        |       | DS3        |       | Modus | Saka 3006 | Saka 3008 | HeTi 117-06 | Pawo | TIW671 |
|------------|-------|-------|------------|-------|------------|-------|------------|-------|-------|-----------|-----------|-------------|------|--------|
|            |       |       | QTL-effect | $p_G$ | QTL-effect | $p_G$ | QTL-effect | $p_G$ |       |           |           |             |      |        |
| wPt-7026   | 2A    | 48.9  | -0.23      | 0.2   |            |       |            |       | 0     | 0         | 1         | 0           | 0    | 0      |
| wPt-3114   | 2A    | 62.1  | -0.30      | 2.2   | -0.30      | 2.9   | -0.32      | 4.9   | 1     | 0         | 0         | 1           | 0    | 0      |
| tPt-512917 | 4A    | 17.1  | 0.43       | 1.7   |            |       |            |       | 0     | 1         | 1         | 1           | 1    | 1      |
| wPt-5857   | 4A    | 41.1  | -0.31      | 0.6   |            |       |            |       | 0     | 1         | 1         | 1           | 1    | 0      |
| wPt-7391   | 4A    | 103.8 | -0.19      | 0.7   |            |       |            |       | 1     | 0         | 0         | 1           | 0    | 0      |
| wPt-2329   | 5A    | 34.8  | 0.29       | 0.9   |            |       |            |       | 1     | 0         | 0         | 1           | 1    | 1      |
| wPt-7255   | 5A    | 52.5  |            |       |            |       | -0.22      | 0.7   | 0     | 0         | 0         | 0           | 0    | 1      |
| wPt-4017   | 6A    | 14.5  |            |       |            |       | 0.15       | 1.1   | 1     | 0         | 0         | 0           | 0    | 1      |
| wPt-7330   | 6A    | 14.7  | 0.27       | 1.0   |            |       |            |       | 1     | 0         | 0         | 0           | 0    | 1      |
| wPt-0902   | 6A    | 58.2  |            |       |            |       | -0.50      | 5.0   | 1     | 1         | 1         | 1           | 1    | 0      |
| wPt-2077   | 6A    | 59.2  |            |       | 0.69       | 2.7   |            |       | 1     | 1         | 1         | 0           | 0    | 1      |
| tPt-4209   | 6A    | 62.4  | 0.46       | 4.1   |            |       |            |       | 1     | 1         | 1         | 0           | 1    | 1      |
| wPt-7785   | 7A    | 53.2  | -0.18      | 0.6   |            |       |            |       | 0     | 1         | 1         | 1           | 0    | 0      |
| wPt-7299   | 7A    | 66.0  |            |       | 0.35       | 1.5   |            |       | 0     | 1         | 0         | 0           | 0    | 1      |
| wPt-0494   | 7A    | 121.9 | 0.21       | 0.9   |            |       |            |       | 1     | 0         | 0         | 0           | 1    | 1      |
| wPt-5003   | 1B    | 27.7  | 0.45       | 1.8   |            |       |            |       | 0     | 1         | 1         | 0           | 0    | 0      |
| wPt-9958   | 2B    | 134.9 |            |       |            |       | 0.20       | 1.9   | 1     | 0         | 0         | 1           | 0    | 0      |
| tPt-1663   | 2B    | 148.6 | 0.39       | 2.9   |            |       |            |       | 1     | 1         | 1         | 1           | 0    | 0      |
| wPt-9422   | 3B    | 98.7  |            |       | -0.27      | 0.4   | -0.15      | 0.2   | 0     | 1         | 0         | 1           | 0    | 0      |
| tPt-513153 | 3B    | 101.4 | 0.15       | 0.4   |            |       |            |       | 1     | 0         | 0         | 0           | 1    | 1      |
| wPt-6016   | 4B    | 54.9  | 0.33       | 0.7   |            |       |            |       | 1     | 1         | 1         | 1           | 0    | 1      |
| wPt-1548   | 5B    | 39.9  | 0.52       | 1.5   | 0.43       | 1.6   |            |       | 1     | 1         | 1         | 1           | 1    | 0      |
| wPt-1733   | 5B    | 59.1  |            |       | 0.45       | 1.3   |            |       | 0     | 0         | 0         | 0           | 1    | 0      |
| wPt-3304   | 6B    | 5.0   | 0.32       | 0.6   |            |       |            |       | 1     | 0         | 1         | 1           | 0    | 1      |
| wPt-7426   | 6B    | 51.5  |            |       |            |       | -0.20      | 1.1   | 0     | 0         | 0         | 1           | 0    | 0      |
| wPt-2400   | 6B    | 53.2  | 0.20       | 0.7   |            |       |            |       | 0     | 1         | 1         | 0           | 1    | 1      |
| wPt-3581   | 6B    | 76.5  | 0.33       | 1.5   | 0.33       | 1.3   | 0.30       | 1.4   | 0     | 1         | 1         | 1           | 1    | 1      |
| rPt-505542 | 6B    | 117.7 |            |       | 0.22       | 1.1   |            |       | 0     | 1         | 1         | 1           | 0    | 0      |
| wPt-1149   | 7B    | 71.2  | 0.52       | 2.8   |            |       |            |       | 1     | 1         | 1         | 1           | 0    | 1      |
| rPt-507396 | 3R    | 35.2  |            |       |            |       | -0.33      | 0.9   | 1     | 1         | 1         | 1           | 1    | 0      |
| rPt-402572 | 3R    | 35.4  |            |       | -0.22      | 0.8   |            |       | 1     | 0         | 0         | 1           | 1    | 0      |
| rPt-389770 | 4R    | 9.9   | 0.60       | 1.5   |            |       |            |       | 1     | 0         | 1         | -           | -    | -      |
| rPt-509552 | 4R    | 45.9  | 0.48       | 2.0   |            |       |            |       | 0     | 0         | 0         | 0           | 1    | 0      |
| rPt-509321 | 4R    | 63.4  |            |       | -0.49      | 3.1   |            |       | 1     | 0         | 0         | 1           | 0    | 0      |
| rPt-389618 | 4R    | 63.8  |            |       | -0.50      | 0.1   |            |       | 0     | 1         | 1         | 0           | 1    | 1      |
| rPt-506436 | 4R    | 65.0  | 0.51       | 2.3   |            |       |            |       | 1     | 0         | 0         | 0           | 0    | 1      |
| rPt-410866 | 4R    | 65.4  |            |       |            |       | -0.22      | 1.9   | 0     | 1         | 0         | 1           | 0    | 0      |
| rPt-399681 | 5R    | 18.9  | 1.33       | 13.0  | 1.45       | 18.3  | 1.04       | 17.4  | 0     | 0         | 0         | 1           | 1    | 0      |
| rPt-402367 | 5R    | 35.2  |            |       |            |       | 0.30       | 1.8   | 0     | 0         | 0         | 1           | 0    | 1      |
| rPt-508041 | 5R    | 36.5  | 0.38       | 0.7   |            |       |            |       | 0     | 0         | 0         | 1           | 0    | 1      |
| rPt-505265 | 5R    | 81.3  | 0.09       | 0.1   |            |       |            |       | 1     | 0         | 0         | 1           | 1    | 1      |
| rPt-507562 | 6R    | 41.2  |            |       | -0.36      | 2.6   |            |       | 0     | 0         | 1         | 1           | 0    | 0      |
| rPt-401125 | 6R    | 46.2  | -0.54      | 3.5   |            |       | -0.24      | 1.4   | 0     | 0         | 0         | 1           | 0    | 0      |
| rPt-508379 | 6R    | 62.8  | 0.24       | 0.5   |            |       |            |       | 1     | 0         | 0         | 0           | 1    | 1      |
| rPt-390698 | 6R    | 72.3  | 0.43       | 0.9   |            |       |            |       | 0     | 1         | 1         | 1           | 1    | 0      |
| rPt-400878 | 7R    | 40.4  |            |       |            |       | 0.21       | 1.1   | 0     | 1         | 0         | 1           | 1    | 0      |
| rPt-390741 | 7R    | 43.3  | -0.35      | 1.4   |            |       |            |       | 1     | 0         | 1         | 0           | 0    | 1      |
| rPt-401147 | 7R    | 44.6  |            |       | 0.39       | 0.8   |            |       | 1     | 1         | 0         | 1           | 1    | 1      |

**Table S3 QTL detected for the progression in developmental stage between the three time points (DS1, DS2, DS3).** Chromosome, position (in cM), QTL-effect and proportion of genotypic variance explained by the QTL (in percent). Markers within an arbitrarily defined 10 cM interval were considered as identical QTL.

| Marker     | Chr. | Position | DS1-DS2    |       | DS2-DS3    |       | DS1-DS3    |       |
|------------|------|----------|------------|-------|------------|-------|------------|-------|
|            |      |          | QTL-effect | $p_G$ | QTL-effect | $p_G$ | QTL-effect | $p_G$ |
| wPt-2866   | 3A   | 18.8     |            |       |            |       | 0.03       | 0.0   |
| wPt-9761   | 3A   | 87.7     | -0.34      | 2.2   |            |       |            |       |
| wPt-8657   | 4A   | 12.6     | 0.16       | 1.9   |            |       |            |       |
| wPt-3334   | 5A   | 2.5      |            |       |            |       | 0.32       | 1.3   |
| wPt-2329   | 5A   | 34.8     | -0.23      | 0.0   |            |       |            |       |
| wPt-0259   | 6A   | 38.1     |            |       |            |       | 0.24       | 0.2   |
| wPt-5101   | 7A   | 3.3      |            |       | -0.45      | 6.4   |            |       |
| wPt-3523   | 7A   | 22.8     |            |       |            |       | -0.36      | 3.5   |
| wPt-7066   | 1B   | 46.4     |            |       |            |       | 0.32       | 4.2   |
| wPt-8460   | 2B   | 112.0    |            |       |            |       | -0.20      | 2.4   |
| rPt-506241 | 2B   | 113.9    |            |       | -0.26      | 1.3   |            |       |
| tPt-1663   | 2B   | 148.6    |            |       |            |       | -0.20      | 1.0   |
| wPt-9274   | 2B   | 151.7    |            |       | -0.21      | 1.6   |            |       |
| wPt-345354 | 3B   | 81.8     |            |       |            |       | 0.21       | 1.6   |
| wPt-8106   | 5B   | 38.0     |            |       |            |       | -0.27      | 1.3   |
| wPt-5604   | 5B   | 51.0     | -0.11      | 0.4   |            |       |            |       |
| tPt-1253   | 5B   | 67.9     | -0.27      | 2.8   |            |       |            |       |
| wPt-8641   | 6B   | 2.6      |            |       |            |       | -0.21      | 0.2   |
| wPt-8721   | 6B   | 57.8     | 0.27       | 2.1   |            |       |            |       |
| rPt-506392 | 1R   | 19.9     | 0.07       | 0.0   |            |       |            |       |
| tPt-513832 | 2Ra  | 60.4     |            |       |            |       | -0.38      | 1.3   |
| rPt-507396 | 3R   | 35.2     | -0.10      | 0.0   |            |       |            |       |
| rPt-507569 | 3R   | 84.0     |            |       | 0.27       | 3.7   |            |       |
| rPt-389770 | 4R   | 9.9      |            |       |            |       | -0.42      | 0.3   |
| rPt-401450 | 4R   | 28.2     | -0.57      | 7.4   |            |       |            |       |
| rPt-505225 | 4R   | 63.8     | 0.31       | 0.9   |            |       |            |       |
| rPt-505489 | 4R   | 63.9     |            |       | -0.07      | 0.3   |            |       |
| rPt-411490 | 4R   | 63.9     |            |       |            |       | -0.27      | 3.9   |
| rPt-390324 | 4R   | 66.3     |            |       |            |       | 0.36       | 4.0   |
| rPt-509721 | 5R   | 17.0     |            |       | -0.28      | 10.6  |            |       |
| rPt-399462 | 5R   | 51.1     |            |       |            |       | 0.38       | 3.6   |
| rPt-400368 | 5R   | 55.6     | 0.11       | 0.3   |            |       |            |       |
| tPt-513060 | 6R   | 36.2     |            |       |            |       | -0.42      | 6.2   |
| rPt-8205   | 6R   | 40.6     | -0.10      | 0.7   |            |       |            |       |
| rPt-507115 | 6R   | 41.7     |            |       |            |       | 0.25       | 2.9   |
| rPt-402205 | 6R   | 55.7     |            |       | 0.47       | 4.2   |            |       |
| rPt-390750 | 7R   | 40.6     |            |       |            |       | -0.34      | 0.2   |
| tPt-514019 | 7R   | 41.0     | 0.07       | 0.5   |            |       |            |       |
