# Supplementary material for: Adult Plant Development in Triticale (× Triticosecale Wittmack) Is Controlled by Dynamic Genetic Patterns of Regulation
Source: PubMed Central journal article supplement (PMC4169150; doi:10.1534/g3.114.012989), 2014-09-01
Supplement: supp_4.9.1585_FigureS2.pdf [file supp_4.9.1585_FigureS2.pdf]

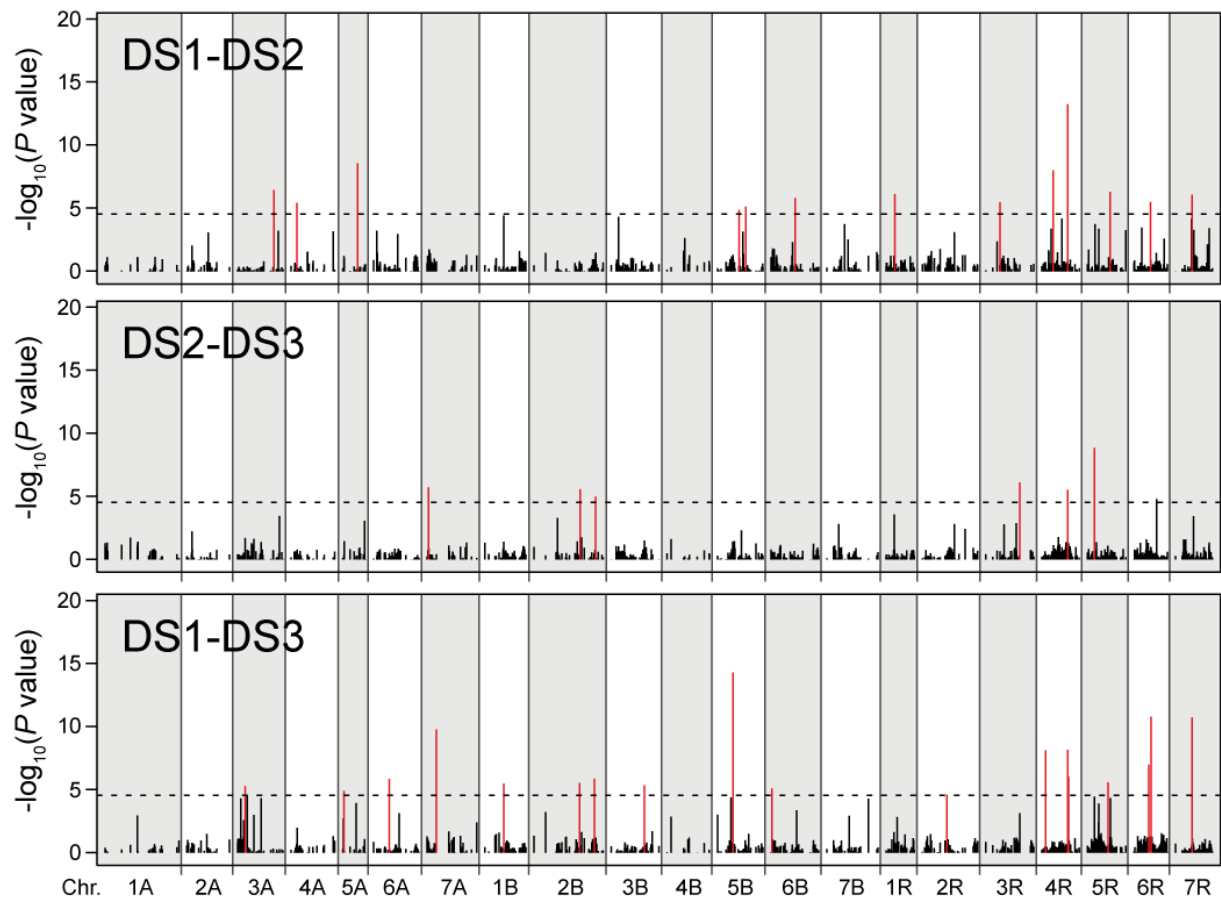

**Figure S2** QTL detected for the progression in developmental stage between the three time points (DS1, DS2, DS3).
