# Supplementary material for: Adult Plant Development in Triticale (× Triticosecale Wittmack) Is Controlled by Dynamic Genetic Patterns of Regulation
Source: PubMed Central journal article supplement (PMC4169150; doi:10.1534/g3.114.012989), 2014-09-01
Supplement: supp_4.9.1585_FigureS3.pdf [file supp_4.9.1585_FigureS3.pdf]

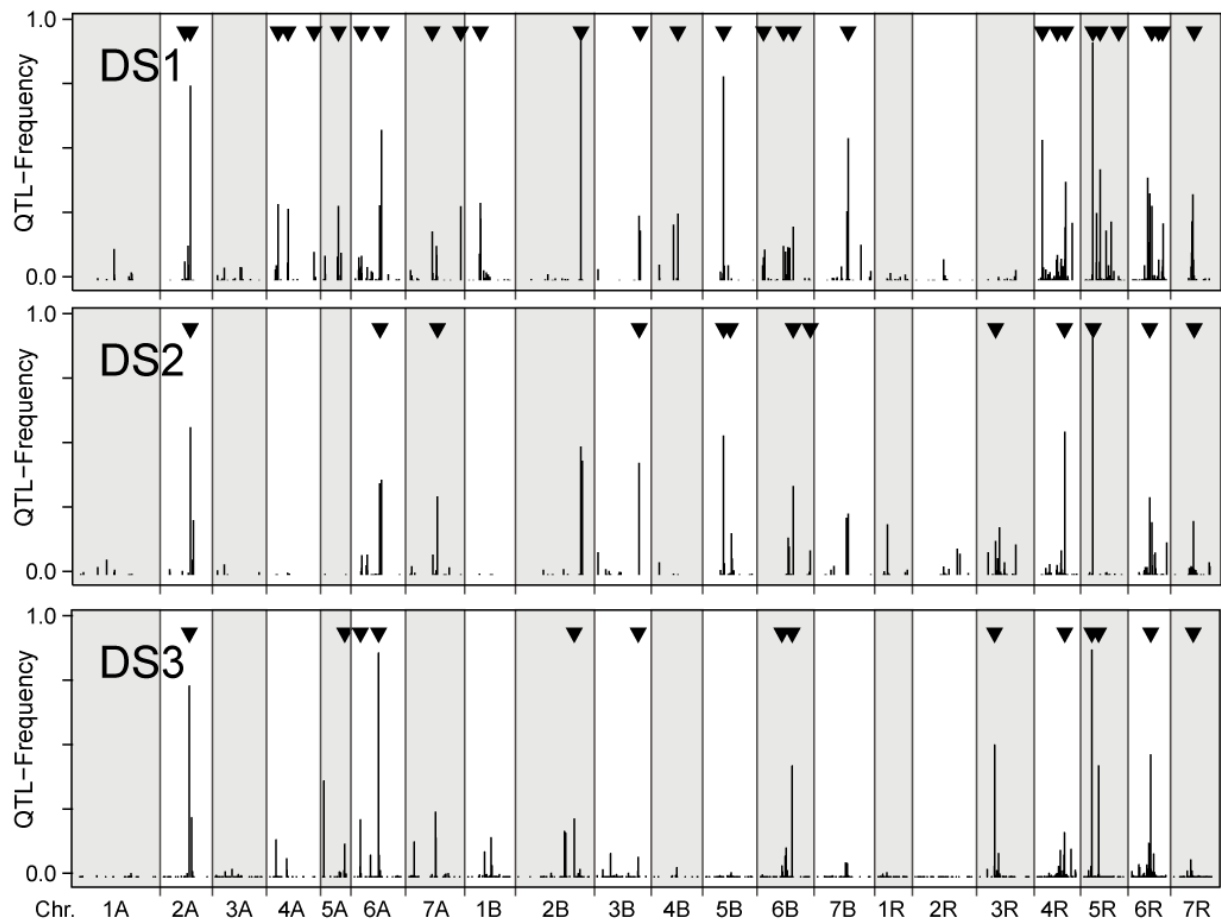

**Figure S3** Frequency distributions from the fivefold cross-validation for the QTL detected for developmental stage at three time points (DS1-DS3). The arrowheads indicate the positions of QTL detected with the full data set.
