# Supplementary material for: Adult Plant Development in Triticale (× Triticosecale Wittmack) Is Controlled by Dynamic Genetic Patterns of Regulation
Source: PubMed Central journal article supplement (PMC4169150; doi:10.1534/g3.114.012989), 2014-09-01
Supplement: supp_4.9.1585_TableS1.pdf [file supp_4.9.1585_TableS1.pdf]

**Table S1 Summary statistics for developmental stage at three time points (DS1-DS3).**

|                         | DS1    | DS2    | DS3    |
|-------------------------|--------|--------|--------|
| Min                     | 38.0   | 58.6   | 74.6   |
| Mean                    | 44.0   | 67.0   | 80.9   |
| Max                     | 49.6   | 69.4   | 84.3   |
| $\sigma_G^2$            | 4.48** | 3.25** | 1.96** |
| $\sigma_{G \times E}^2$ | 1.01** | 1.45** | 0.62** |
| $\sigma_e^2$            | 1.53   | 1.28   | 3.56   |
| $h^2$                   | 0.90   | 0.85   | 0.72   |

Genotypic variance ( $\sigma_G^2$ ), genotype-by-environment interaction variance ( $\sigma_{G \times E}^2$ ), error variance ( $\sigma_e^2$ ) and heritability ( $h^2$ ). \*\*significant at  $P < 0.01$
