# Supplementary material for: Adult Plant Development in Triticale (× Triticosecale Wittmack) Is Controlled by Dynamic Genetic Patterns of Regulation
Source: PubMed Central journal article supplement (PMC4169150; doi:10.1534/g3.114.012989), 2014-09-01
Supplement: supp_4.9.1585_TableS2.pdf [file supp_4.9.1585_TableS2.pdf]

**Table S2 QTL detected for developmental stage at three time points (DS1-DS3).** Chromosome, position (in cM), QTL-effect and proportion of genotypic variance explained by the QTL (in percent). Markers within an arbitrarily defined 10 cM interval were considered as identical QTL. The allele status of the six parents at these markers is also provided.

| Marker     | Ch r. | Pos.  | DS1        |       | DS2        |       | DS3        |       | Modus | Saka 3006 | Saka 3008 | HeTi 117-06 | Pawo | TIW671 |
|------------|-------|-------|------------|-------|------------|-------|------------|-------|-------|-----------|-----------|-------------|------|--------|
|            |       |       | QTL-effect | $p_G$ | QTL-effect | $p_G$ | QTL-effect | $p_G$ |       |           |           |             |      |        |
| wPt-7026   | 2A    | 48.9  | -0.23      | 0.2   |            |       |            |       | 0     | 0         | 1         | 0           | 0    | 0      |
| wPt-3114   | 2A    | 62.1  | -0.30      | 2.2   | -0.30      | 2.9   | -0.32      | 4.9   | 1     | 0         | 0         | 1           | 0    | 0      |
| tPt-512917 | 4A    | 17.1  | 0.43       | 1.7   |            |       |            |       | 0     | 1         | 1         | 1           | 1    | 1      |
| wPt-5857   | 4A    | 41.1  | -0.31      | 0.6   |            |       |            |       | 0     | 1         | 1         | 1           | 1    | 0      |
| wPt-7391   | 4A    | 103.8 | -0.19      | 0.7   |            |       |            |       | 1     | 0         | 0         | 1           | 0    | 0      |
| wPt-2329   | 5A    | 34.8  | 0.29       | 0.9   |            |       |            |       | 1     | 0         | 0         | 1           | 1    | 1      |
| wPt-7255   | 5A    | 52.5  |            |       |            |       | -0.22      | 0.7   | 0     | 0         | 0         | 0           | 0    | 1      |
| wPt-4017   | 6A    | 14.5  |            |       |            |       | 0.15       | 1.1   | 1     | 0         | 0         | 0           | 0    | 1      |
| wPt-7330   | 6A    | 14.7  | 0.27       | 1.0   |            |       |            |       | 1     | 0         | 0         | 0           | 0    | 1      |
| wPt-0902   | 6A    | 58.2  |            |       |            |       | -0.50      | 5.0   | 1     | 1         | 1         | 1           | 1    | 0      |
| wPt-2077   | 6A    | 59.2  |            |       | 0.69       | 2.7   |            |       | 1     | 1         | 1         | 0           | 0    | 1      |
| tPt-4209   | 6A    | 62.4  | 0.46       | 4.1   |            |       |            |       | 1     | 1         | 1         | 0           | 1    | 1      |
| wPt-7785   | 7A    | 53.2  | -0.18      | 0.6   |            |       |            |       | 0     | 1         | 1         | 1           | 0    | 0      |
| wPt-7299   | 7A    | 66.0  |            |       | 0.35       | 1.5   |            |       | 0     | 1         | 0         | 0           | 0    | 1      |
| wPt-0494   | 7A    | 121.9 | 0.21       | 0.9   |            |       |            |       | 1     | 0         | 0         | 0           | 1    | 1      |
| wPt-5003   | 1B    | 27.7  | 0.45       | 1.8   |            |       |            |       | 0     | 1         | 1         | 0           | 0    | 0      |
| wPt-9958   | 2B    | 134.9 |            |       |            |       | 0.20       | 1.9   | 1     | 0         | 0         | 1           | 0    | 0      |
| tPt-1663   | 2B    | 148.6 | 0.39       | 2.9   |            |       |            |       | 1     | 1         | 1         | 1           | 0    | 0      |
| wPt-9422   | 3B    | 98.7  |            |       | -0.27      | 0.4   | -0.15      | 0.2   | 0     | 1         | 0         | 1           | 0    | 0      |
| tPt-513153 | 3B    | 101.4 | 0.15       | 0.4   |            |       |            |       | 1     | 0         | 0         | 0           | 1    | 1      |
| wPt-6016   | 4B    | 54.9  | 0.33       | 0.7   |            |       |            |       | 1     | 1         | 1         | 1           | 0    | 1      |
| wPt-1548   | 5B    | 39.9  | 0.52       | 1.5   | 0.43       | 1.6   |            |       | 1     | 1         | 1         | 1           | 1    | 0      |
| wPt-1733   | 5B    | 59.1  |            |       | 0.45       | 1.3   |            |       | 0     | 0         | 0         | 0           | 1    | 0      |
| wPt-3304   | 6B    | 5.0   | 0.32       | 0.6   |            |       |            |       | 1     | 0         | 1         | 1           | 0    | 1      |
| wPt-7426   | 6B    | 51.5  |            |       |            |       | -0.20      | 1.1   | 0     | 0         | 0         | 1           | 0    | 0      |
| wPt-2400   | 6B    | 53.2  | 0.20       | 0.7   |            |       |            |       | 0     | 1         | 1         | 0           | 1    | 1      |
| wPt-3581   | 6B    | 76.5  | 0.33       | 1.5   | 0.33       | 1.3   | 0.30       | 1.4   | 0     | 1         | 1         | 1           | 1    | 1      |
| rPt-505542 | 6B    | 117.7 |            |       | 0.22       | 1.1   |            |       | 0     | 1         | 1         | 1           | 0    | 0      |
| wPt-1149   | 7B    | 71.2  | 0.52       | 2.8   |            |       |            |       | 1     | 1         | 1         | 1           | 0    | 1      |
| rPt-507396 | 3R    | 35.2  |            |       |            |       | -0.33      | 0.9   | 1     | 1         | 1         | 1           | 1    | 0      |
| rPt-402572 | 3R    | 35.4  |            |       | -0.22      | 0.8   |            |       | 1     | 0         | 0         | 1           | 1    | 0      |
| rPt-389770 | 4R    | 9.9   | 0.60       | 1.5   |            |       |            |       | 1     | 0         | 1         | -           | -    | -      |
| rPt-509552 | 4R    | 45.9  | 0.48       | 2.0   |            |       |            |       | 0     | 0         | 0         | 0           | 1    | 0      |
| rPt-509321 | 4R    | 63.4  |            |       | -0.49      | 3.1   |            |       | 1     | 0         | 0         | 1           | 0    | 0      |
| rPt-389618 | 4R    | 63.8  |            |       | -0.50      | 0.1   |            |       | 0     | 1         | 1         | 0           | 1    | 1      |
| rPt-506436 | 4R    | 65.0  | 0.51       | 2.3   |            |       |            |       | 1     | 0         | 0         | 0           | 0    | 1      |
| rPt-410866 | 4R    | 65.4  |            |       |            |       | -0.22      | 1.9   | 0     | 1         | 0         | 1           | 0    | 0      |
| rPt-399681 | 5R    | 18.9  | 1.33       | 13.0  | 1.45       | 18.3  | 1.04       | 17.4  | 0     | 0         | 0         | 1           | 1    | 0      |
| rPt-402367 | 5R    | 35.2  |            |       |            |       | 0.30       | 1.8   | 0     | 0         | 0         | 1           | 0    | 1      |
| rPt-508041 | 5R    | 36.5  | 0.38       | 0.7   |            |       |            |       | 0     | 0         | 0         | 1           | 0    | 1      |
| rPt-505265 | 5R    | 81.3  | 0.09       | 0.1   |            |       |            |       | 1     | 0         | 0         | 1           | 1    | 1      |
| rPt-507562 | 6R    | 41.2  |            |       | -0.36      | 2.6   |            |       | 0     | 0         | 1         | 1           | 0    | 0      |
| rPt-401125 | 6R    | 46.2  | -0.54      | 3.5   |            |       | -0.24      | 1.4   | 0     | 0         | 0         | 1           | 0    | 0      |
| rPt-508379 | 6R    | 62.8  | 0.24       | 0.5   |            |       |            |       | 1     | 0         | 0         | 0           | 1    | 1      |
| rPt-390698 | 6R    | 72.3  | 0.43       | 0.9   |            |       |            |       | 0     | 1         | 1         | 1           | 1    | 0      |
| rPt-400878 | 7R    | 40.4  |            |       |            |       | 0.21       | 1.1   | 0     | 1         | 0         | 1           | 1    | 0      |
| rPt-390741 | 7R    | 43.3  | -0.35      | 1.4   |            |       |            |       | 1     | 0         | 1         | 0           | 0    | 1      |
| rPt-401147 | 7R    | 44.6  |            |       | 0.39       | 0.8   |            |       | 1     | 1         | 0         | 1           | 1    | 1      |
