# Supplementary material for: Adult Plant Development in Triticale (× Triticosecale Wittmack) Is Controlled by Dynamic Genetic Patterns of Regulation
Source: PubMed Central journal article supplement (PMC4169150; doi:10.1534/g3.114.012989), 2014-09-01
Supplement: supp_4.9.1585_TableS3.pdf [file supp_4.9.1585_TableS3.pdf]

**Table S3 QTL detected for the progression in developmental stage between the three time points (DS1, DS2, DS3).** Chromosome, position (in cM), QTL-effect and proportion of genotypic variance explained by the QTL (in percent). Markers within an arbitrarily defined 10 cM interval were considered as identical QTL.

| Marker     | Chr. | Position | DS1-DS2    |       | DS2-DS3    |       | DS1-DS3    |       |
|------------|------|----------|------------|-------|------------|-------|------------|-------|
|            |      |          | QTL-effect | $p_G$ | QTL-effect | $p_G$ | QTL-effect | $p_G$ |
| wPt-2866   | 3A   | 18.8     |            |       |            |       | 0.03       | 0.0   |
| wPt-9761   | 3A   | 87.7     | -0.34      | 2.2   |            |       |            |       |
| wPt-8657   | 4A   | 12.6     | 0.16       | 1.9   |            |       |            |       |
| wPt-3334   | 5A   | 2.5      |            |       |            |       | 0.32       | 1.3   |
| wPt-2329   | 5A   | 34.8     | -0.23      | 0.0   |            |       |            |       |
| wPt-0259   | 6A   | 38.1     |            |       |            |       | 0.24       | 0.2   |
| wPt-5101   | 7A   | 3.3      |            |       | -0.45      | 6.4   |            |       |
| wPt-3523   | 7A   | 22.8     |            |       |            |       | -0.36      | 3.5   |
| wPt-7066   | 1B   | 46.4     |            |       |            |       | 0.32       | 4.2   |
| wPt-8460   | 2B   | 112.0    |            |       |            |       | -0.20      | 2.4   |
| rPt-506241 | 2B   | 113.9    |            |       | -0.26      | 1.3   |            |       |
| tPt-1663   | 2B   | 148.6    |            |       |            |       | -0.20      | 1.0   |
| wPt-9274   | 2B   | 151.7    |            |       | -0.21      | 1.6   |            |       |
| wPt-345354 | 3B   | 81.8     |            |       |            |       | 0.21       | 1.6   |
| wPt-8106   | 5B   | 38.0     |            |       |            |       | -0.27      | 1.3   |
| wPt-5604   | 5B   | 51.0     | -0.11      | 0.4   |            |       |            |       |
| tPt-1253   | 5B   | 67.9     | -0.27      | 2.8   |            |       |            |       |
| wPt-8641   | 6B   | 2.6      |            |       |            |       | -0.21      | 0.2   |
| wPt-8721   | 6B   | 57.8     | 0.27       | 2.1   |            |       |            |       |
| rPt-506392 | 1R   | 19.9     | 0.07       | 0.0   |            |       |            |       |
| tPt-513832 | 2Ra  | 60.4     |            |       |            |       | -0.38      | 1.3   |
| rPt-507396 | 3R   | 35.2     | -0.10      | 0.0   |            |       |            |       |
| rPt-507569 | 3R   | 84.0     |            |       | 0.27       | 3.7   |            |       |
| rPt-389770 | 4R   | 9.9      |            |       |            |       | -0.42      | 0.3   |
| rPt-401450 | 4R   | 28.2     | -0.57      | 7.4   |            |       |            |       |
| rPt-505225 | 4R   | 63.8     | 0.31       | 0.9   |            |       |            |       |
| rPt-505489 | 4R   | 63.9     |            |       | -0.07      | 0.3   |            |       |
| rPt-411490 | 4R   | 63.9     |            |       |            |       | -0.27      | 3.9   |
| rPt-390324 | 4R   | 66.3     |            |       |            |       | 0.36       | 4.0   |
| rPt-509721 | 5R   | 17.0     |            |       | -0.28      | 10.6  |            |       |
| rPt-399462 | 5R   | 51.1     |            |       |            |       | 0.38       | 3.6   |
| rPt-400368 | 5R   | 55.6     | 0.11       | 0.3   |            |       |            |       |
| tPt-513060 | 6R   | 36.2     |            |       |            |       | -0.42      | 6.2   |
| rPt-8205   | 6R   | 40.6     | -0.10      | 0.7   |            |       |            |       |
| rPt-507115 | 6R   | 41.7     |            |       |            |       | 0.25       | 2.9   |
| rPt-402205 | 6R   | 55.7     |            |       | 0.47       | 4.2   |            |       |
| rPt-390750 | 7R   | 40.6     |            |       |            |       | -0.34      | 0.2   |
| tPt-514019 | 7R   | 41.0     | 0.07       | 0.5   |            |       |            |       |
